# Supplementary material for: Modulating the aggregation of human prion protein PrP106–126 by an indole-based cyclometallated palladium complex
Source: Royal Society of Chemistry journal article supplement (doi:10.1039/d4dt00704b), 2024-01-01
Supplement: d4dt00704b1.pdf [file d4dt00704b1.pdf]

## **Modulation of aggregation of human prion protein PrP<sub>106-126</sub> by indole based cyclometallated palladium complex**

Rahul Chauhan,<sup>a</sup> Govinda R. Navale,<sup>a</sup> Saakshi Saini,<sup>b</sup> Abhishek Panwar,<sup>c</sup> Prashant,<sup>a</sup> Rajat Saini,<sup>a</sup> Partha Roy,<sup>b</sup> Kaushik Ghosh<sup>a,b\*</sup>

---

<sup>a.</sup> *Department of Chemistry, Indian Institute of Technology, Roorkee- 247667, Uttarakhand*

<sup>b.</sup> *Department of Biosciences and Bioengineering, Indian Institute of Technology, Roorkee- 247667, Uttarakhand*

<sup>c.</sup> *Department of Chemistry, National Institute of Technology Manipur, Langol-795004*

\*To whom correspondence should be addressed.

E-mail: [kaushik.ghosh@cy.iitr.ac.in](mailto:kaushik.ghosh@cy.iitr.ac.in)

|                |                                                                                 |
|----------------|---------------------------------------------------------------------------------|
| Figure S1      | FT-IR spectrum of Ligand                                                        |
| Figure S2      | FT-IR spectrum of complex                                                       |
| Figure S3      | Electronic absorption spectra of ligand and complex in CH <sub>3</sub> CN       |
| Figure S4      | <sup>1</sup> H-NMR spectra of Ligand in CDCl <sub>3</sub> .                     |
| Figure S5      | <sup>13</sup> C-NMR spectra of Ligand in CDCl <sub>3</sub> .                    |
| Figure S6      | <sup>1</sup> H-NMR spectra of complex in DMSO-d <sub>6</sub> .                  |
| Figure S7      | <sup>13</sup> C-NMR spectra of complex in DMSO-d <sub>6</sub> .                 |
| Figure S8      | HR-MS spectrum of ligand                                                        |
| Figure S9      | HR-MS spectrum of complex                                                       |
| Figure S10     | End point ThT fluorescence assay of PrP <sub>106-126</sub> with complex         |
| Figure S11     | Bar diagram of ThT fluorescence assay of peptide and complex.                   |
| Figure S12     | ThT fluorescence assay with complex.                                            |
| Figure S13     | ThT fluorescence assay of peptide incubated with ligand and PdCl <sub>2</sub> . |
| Figure S14     | Boltzmann sigmoidal curve and equation for calculation of time parameters.      |
| Figure S15     | Histidine binding assay of complex by UV-visible spectroscopy.                  |
| Figure S16     | Methionine binding assay of complex by UV-visible spectroscopy.                 |
| Figure S17     | PrP <sub>106-126</sub> binding assay of complex by UV-visible spectroscopy.     |
| Figure S18     | DNA Binding assay of complex by UV-visible spectroscopy.                        |
| Figure S19     | Fluorescence Binding assay of complex                                           |
| Figure S20-S24 | Molecular docking images and interaction parameters.                            |
| Figure S25-26  | MALDI-TOF MS spectrum of PrP <sub>106-126</sub> alone and with complex.         |
| Figure S27     | ORTEP plot of complex                                                           |
| Table S1       | Summary of crystal data and data-collection parameters for complex.             |
| Table S2       | Bond lengths for complex.                                                       |
| Table S3       | Bond angles for complex.                                                        |

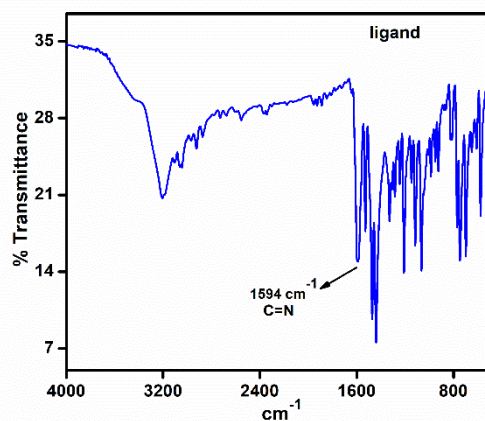

**Figure S1.** FT-IR spectrum of Ligand.

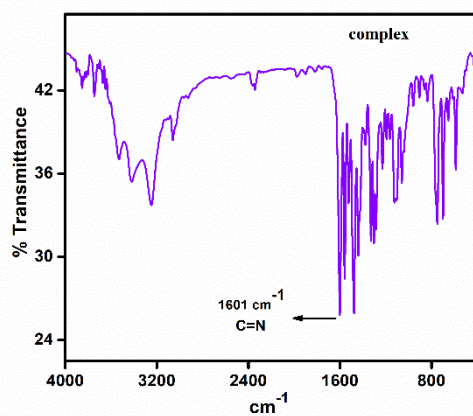

**Figure S2.** FT-IR spectrum of complex.

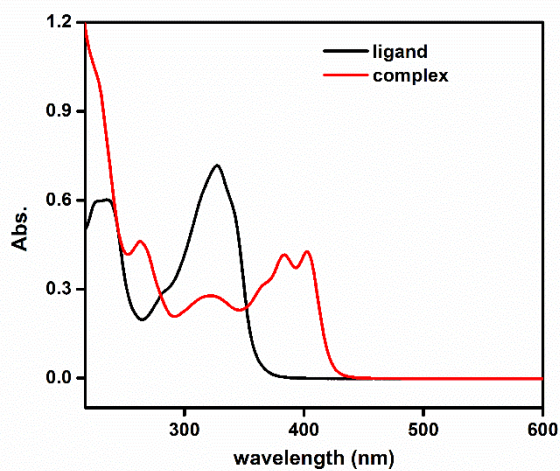

**Figure S3.** UV-Visible spectra of ligand (25.6  $\mu$ M) and complex (23  $\mu$ M) in CH<sub>3</sub>CN.



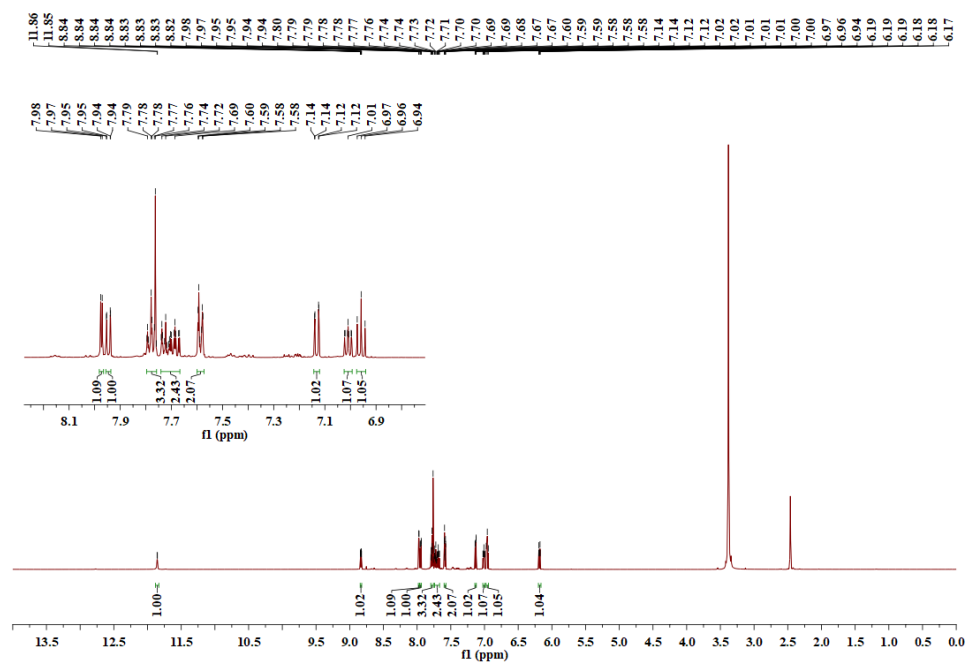

Figure S6:  $^1\text{H}$  NMR spectra of complex in  $\text{DMSO-d}_6$ .

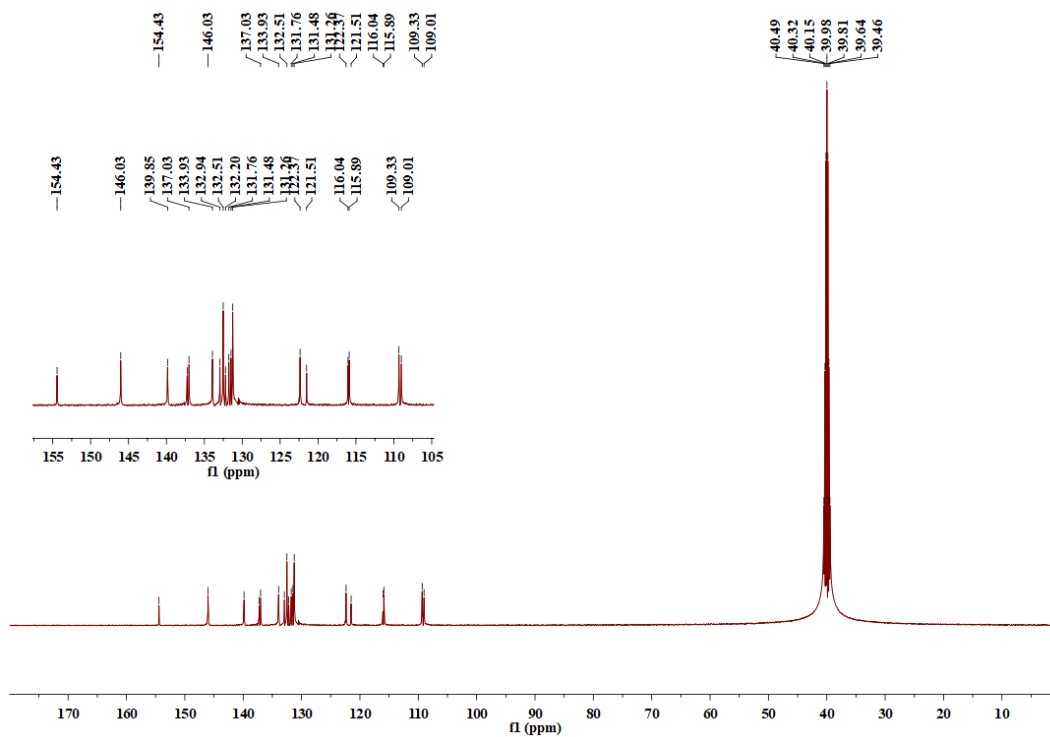

Figure S7:  $^{13}\text{C}$  NMR spectra of complex in  $\text{DMSO-d}_6$ .

# Spectrum Plot Report

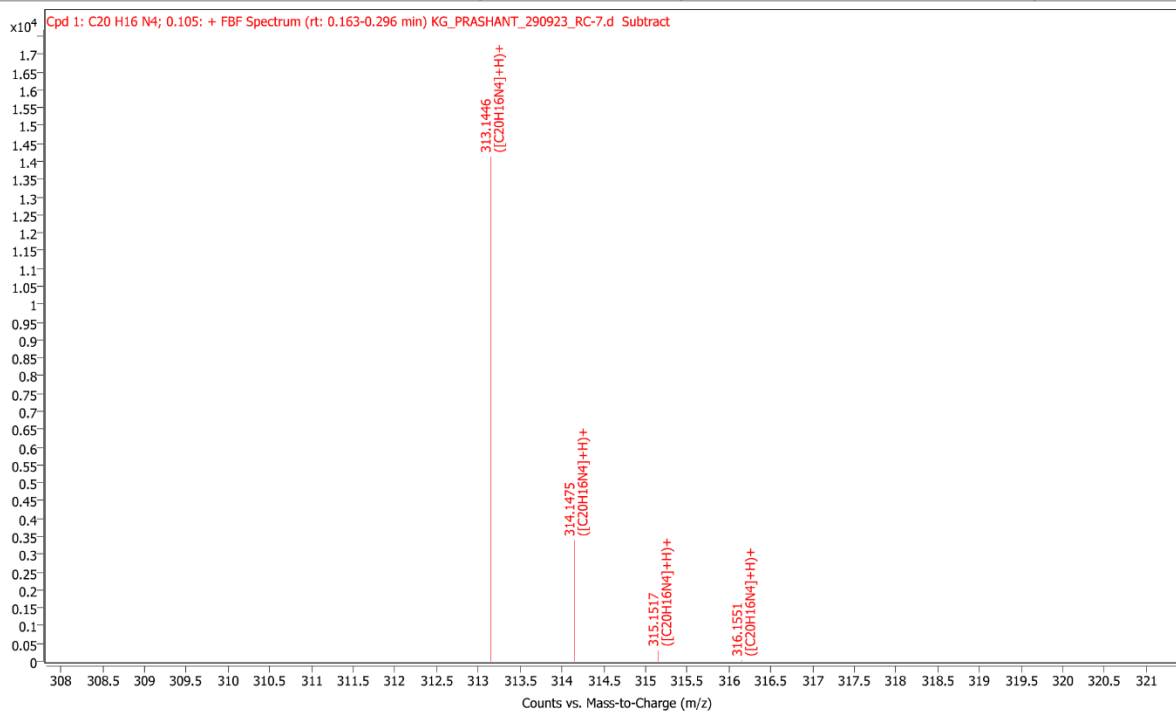

Figure S8: HR-MS spectrum of Ligand.

130223\_AG\_PR\_575

IITRPR

XEVO G2-XS QTOF

Test Name :

130223\_AG\_PR\_575 18 (0.321)

$[M-Cl+CH_3CN]^+$

1: TOF MS ES+

9.42e6

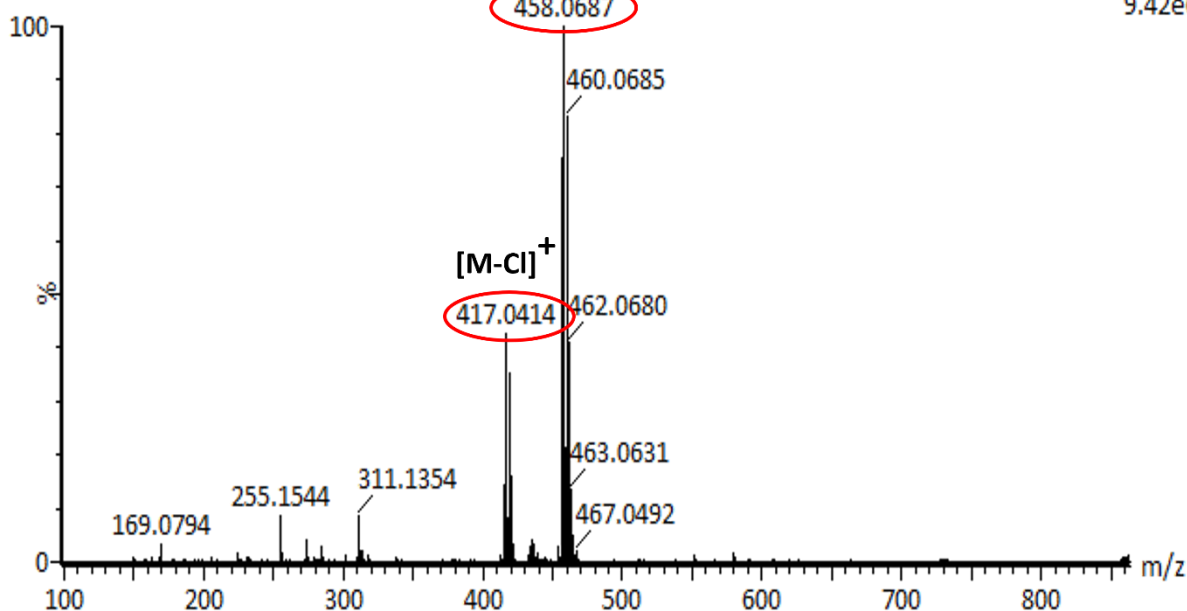

Figure S9: HR-MS spectra of complex.

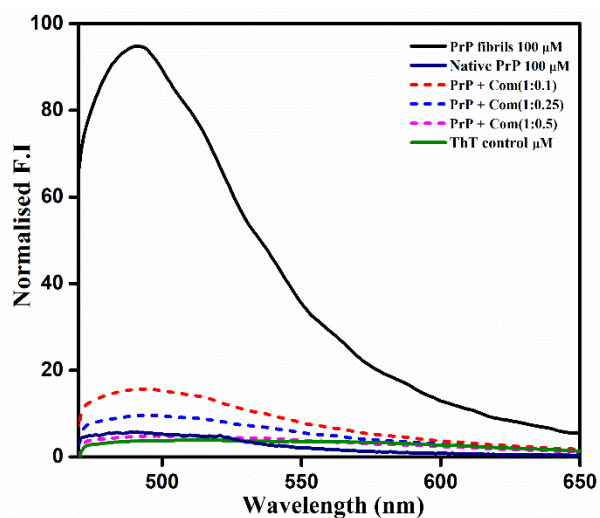

**Figure S10:** End point measurements of native PrP<sub>106-126</sub> (0 h), PrP<sub>106-126</sub> fibrils (24 h) and with complex at different concentrations measured by ThT fluorescence after incubation for 24 h at 37° C. Conditions: All experiments were conducted at physiological pH in PBS buffer, [PrP<sub>106-126</sub>]=100 μM, [ThT]= 10 μM and [complex]= 10, 25 and 50 μM.

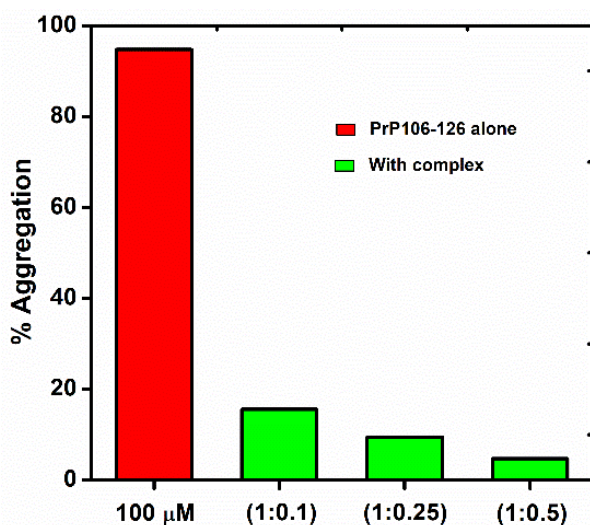

**Figure S11:** Bar diagram of ThT fluorescence showing the amount of aggregation in the absence and presence of complex at varying concentration after incubation for 24 hours at 37° C

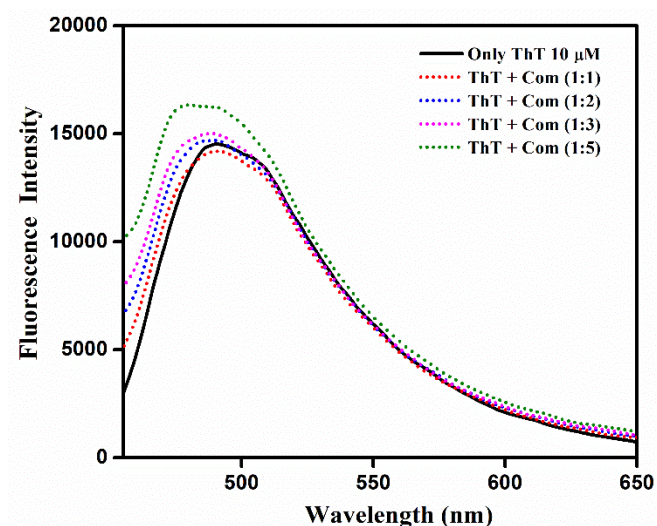

**Figure S12.** The ThT spectra carried out in the presence and absence of complex at different concentration. The FL intensity of metal complex is small enough to be ignored as compared with fluorescence intensity of PrP<sub>106-126</sub>. Conditions:  $\lambda_{\text{ex}} - 440 \text{ nm}$ ,  $\lambda_{\text{em}} - 482-485 \text{ nm}$ , PBS Buffer 10 mM of pH 7.4, [ThT]- 10  $\mu\text{M}$  and [complex]- 10, 20, 30, and 50  $\mu\text{M}$ .

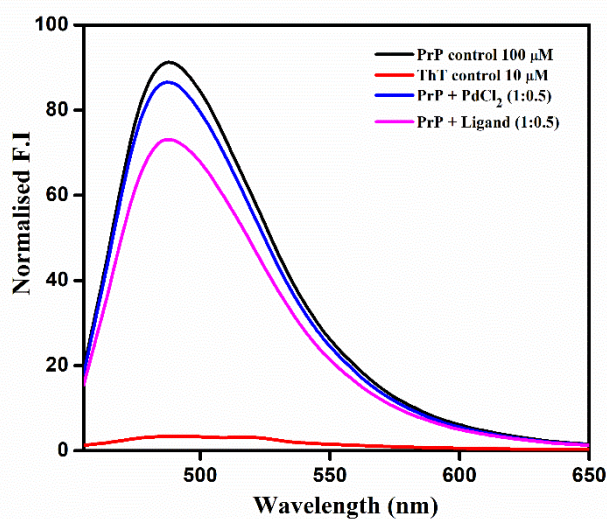

**Figure S13:** ThT fluorescence assay of free PrP<sub>106-126</sub> and in presence of ligand and PdCl<sub>2</sub> after incubated for 24 hours at 37° C. Conditions: Conditions:  $\lambda_{\text{ex}} - 440 \text{ nm}$ ,  $\lambda_{\text{em}} - 482-485 \text{ nm}$ , PBS buffer 10 mM of pH 7.4, [PrP<sub>106-126</sub>]- 100  $\mu\text{M}$ , [ThT]- 10  $\mu\text{M}$  and [Ligand]/[PdCl<sub>2</sub>]- 50  $\mu\text{M}$ .



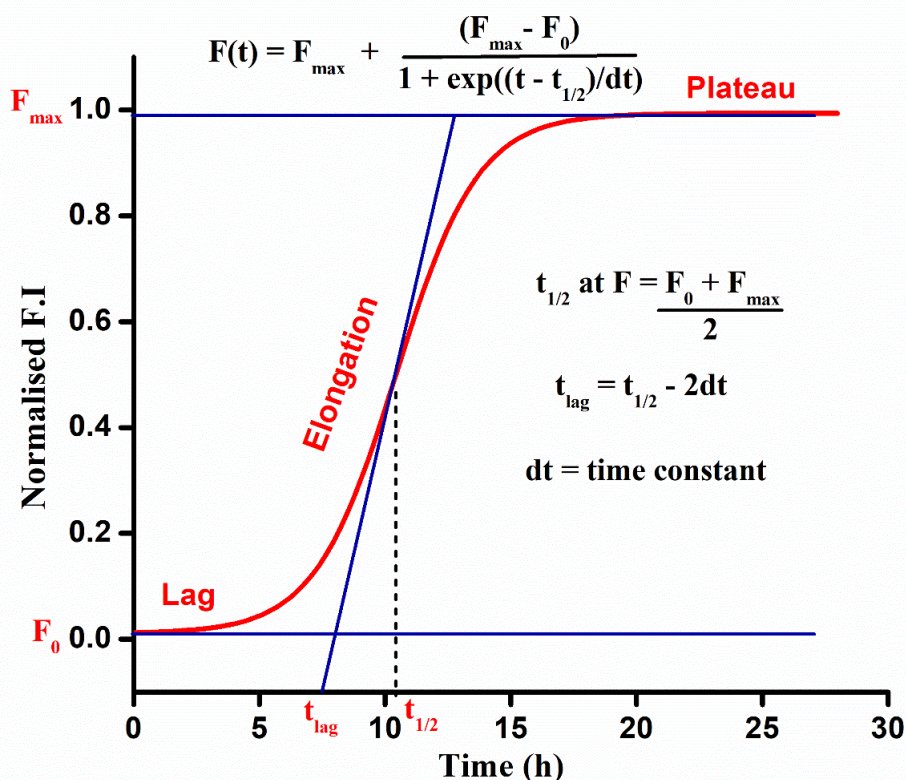

**Figure S14:** The Boltzmann sigmoidal curve and equation for calculation of time parameters. Horizontal blue lines indicate the lowest and highest normalised fluorescence intensity. The red line is a Boltzmann sigmoidal equation fit (with a blue tangent line at the intermediate value of the fit). The intercept of tangent line at x-axis gives  $t_{\text{lag}}$  (lag time) whereas dashed line perpendicular to x-axis at intermediate value of fit gives half time,  $t_{1/2}$ .

### Histidine Binding assay

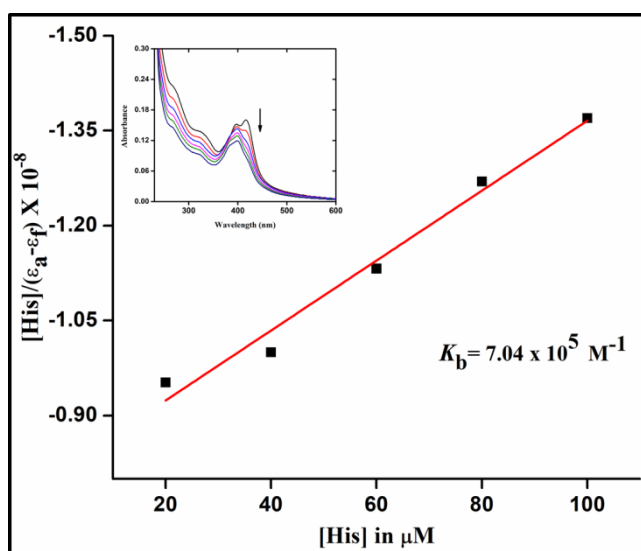

**Figure S15:** Histidine binding assay of complex using UV-Visible spectroscopy.

### Methionine Binding assay

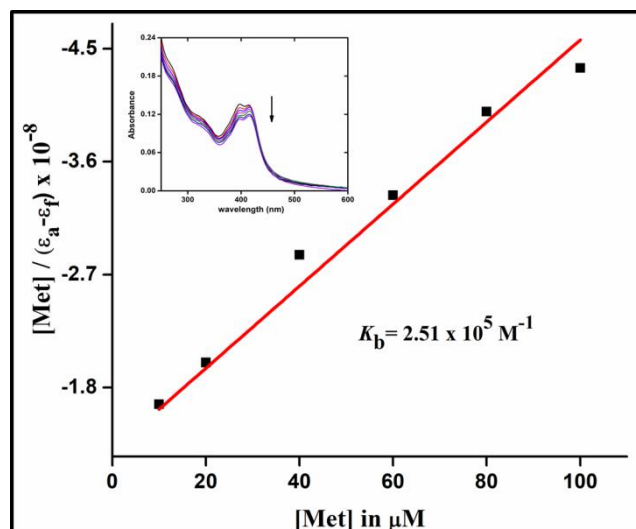

**Figure S16:** Methionine binding assay of complex using UV-Visible spectroscopy.

#### Procedure for amino acid binding assay:

Absorption spectra of complex at 10  $\mu\text{M}$  concentration upon addition of histidine and methionine (0-100  $\mu\text{M}$ ) with incubation of 3-5 minutes at every concentration. The ( $\downarrow$ ) arrows indicate absorbance changes upon increasing the amino acid (A.A) concentration. The amino acid binding constant ( $K_b$ ) for complex is plotted as  $[A. A]/(\epsilon_a - \epsilon_f)$  vs  $[A. A]$ . The data were applied to the following equation, and the binding constant  $K_b$  was calculated using the wolfe-shimmer equation similar to that of DNA binding assay,

$$[A. A]/[\epsilon_a - \epsilon_f] = [A. A] / [\epsilon_b - \epsilon_f] + 1/K_b[\epsilon_b - \epsilon_f]$$

Where  $[A. A]$  is the concentration of amino acid in  $\mu\text{M}$ ,  $\epsilon_a$  is the extinction coefficient of the complex at a given amino acid concentration,  $\epsilon_f$  is the extinction coefficient of the complex in free solution, and  $\epsilon_b$  is the extinction coefficient of the complex when fully bound to amino acid. A plot of  $[A. A]/[\epsilon_a - \epsilon_f]$  versus  $[A. A]$  gave a slope and intercept equal to  $1/[\epsilon_b - \epsilon_f]$  and  $(1/K_b) [\epsilon_b - \epsilon_f]$ , respectively. The intrinsic binding constant  $K_b$  is the ratio of the slope to the intercept.

### PrP<sub>106-126</sub> Binding assay

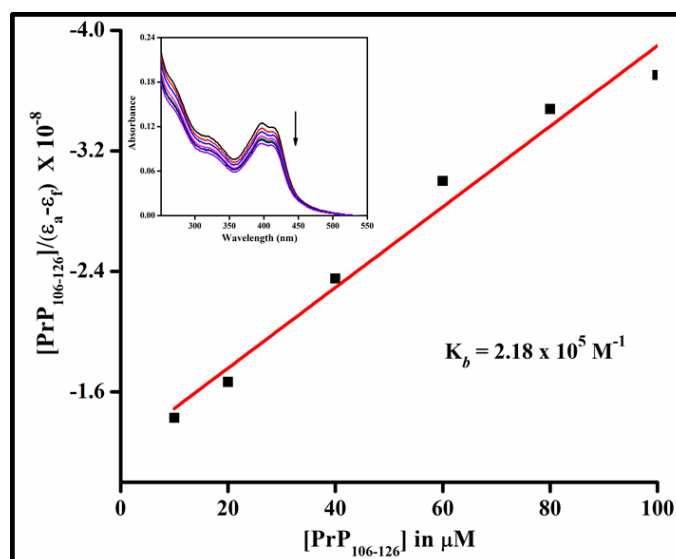

**Figure S17:** PrP<sub>106-126</sub> binding of complex using electronic absorption spectroscopy in PBS buffer in physiological pH.

#### Procedure:

Similar to His and Met binding assay.

## DNA Binding Assay

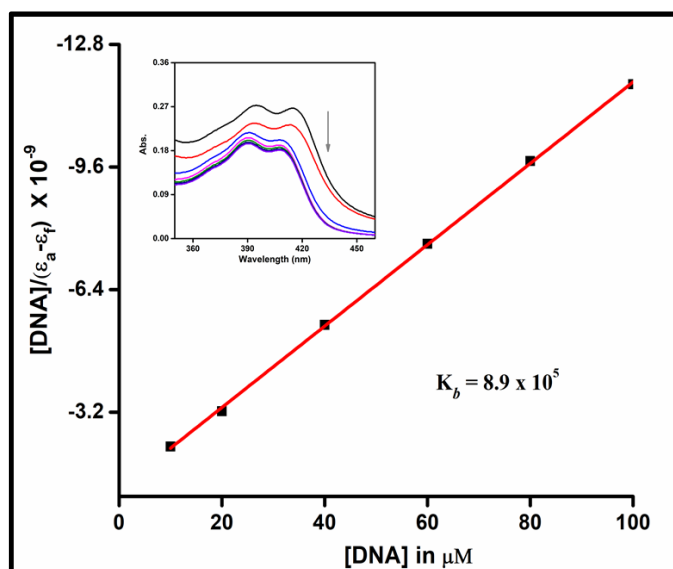

**Figure S18:** DNA binding of complex using electronic absorption spectroscopy.

### Procedure:

All titrations were carried out in Tris buffer (pH 7.2). The DNA concentration per nucleotide was determined by absorption spectroscopy using the molar absorption coefficient ( $6600 \text{ M}^{-1} \text{ cm}^{-1}$ ) at 260 nm. A solution of CT-DNA gave a ratio of UV absorbance at 260 and 280 nm of 1.8–1.9, indicating that DNA was pure and free of protein. The absorption titration experiments of complex were performed at a fixed complex concentration ( $20 \text{ } \mu\text{M}$ ) until the absorbance did not change anymore with increasing DNA concentration ( $0\text{--}100 \text{ } \mu\text{M}$ ) with a incubation of 3-5 minutes at every concentration. The electronic absorption spectra were determined in the range  $200\text{--}500 \text{ nm}$ . The complex–DNA solutions were allowed to incubate for 5 min before the absorption spectra were recorded. The data were applied to the following equation, and the intrinsic binding constant  $K_b$  was calculated using the Wolfe-Shimmer equation:

$$[\text{DNA}]/[\varepsilon_a - \varepsilon_f] = [\text{DNA}]/[\varepsilon_b - \varepsilon_f] + 1/K_b[\varepsilon_b - \varepsilon_f]$$

Where  $[\text{DNA}]$  is the concentration of DNA in base pairs,  $\varepsilon_a$  is the extinction coefficient of the complex at a given DNA concentration,  $\varepsilon_f$  is the extinction coefficient of the complex in free solution, and  $\varepsilon_b$  is the extinction coefficient of the complex when fully bound to DNA. A plot of  $[\text{DNA}]/[\varepsilon_a - \varepsilon_f]$  versus  $[\text{DNA}]$  gave a slope and intercept equal to  $1/[\varepsilon_b - \varepsilon_f]$  and  $(1/K_b)[\varepsilon_b - \varepsilon_f]$ , respectively. The intrinsic binding constant  $K_b$  is the ratio of the slope to the intercept.

## Fluorescence Binding Assay

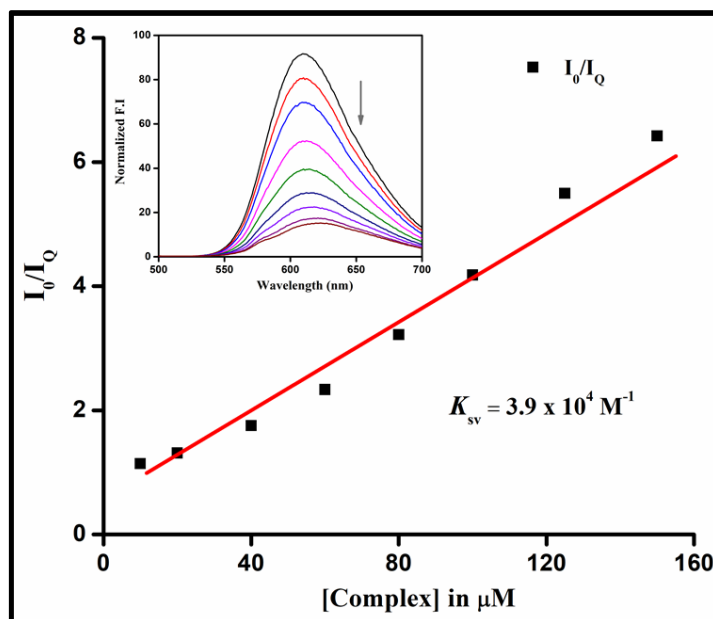

**Figure S19:** DNA binding assay of complex using fluorescence spectroscopy.

### Procedure:

Fluorescence titration experiments were carried out to support the interaction between the complex and CT-DNA further. The fluorescence emission spectra of both the DNA ( $10 \mu M$ ) + EtBr ( $5 \mu M$ ) in the presence of various concentrations of the quencher complex ( $0$ – $150 \mu M$ ) in Tris-HCl buffer (pH 7.2) were recorded between 300 and 700 nm at room temperature with the excitation wavelength set at 285 nm. The Stern-Volmer equation was used to determine the mechanism of interaction:

$$I_0/I_{[Q]} = 1 + K_{SV}/[Q] \text{ or } K_{SV} = ((I_0/I_{[Q]}) - 1)/[Q]$$

In this equation,  $I_0$  and  $I_{[Q]}$  are the fluorescence intensities in the absence and presence of the quencher (complex),  $K_{SV}$  is the Stern-Volmer quenching constant, and  $[Q]$  is the concentration of the quencher (complex). After plotting  $(I_0/I_{[Q]})$  against  $[Q]$ , the slope can be determined to give the value of  $K_{SV}$ , the Stern-Volmer constant.

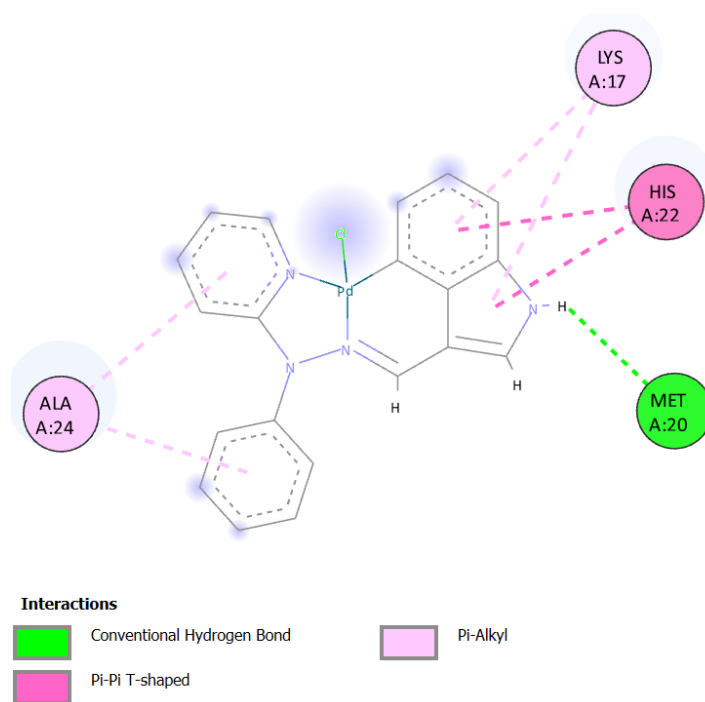

**Figure S20:** 2D Schematic representation displaying the most likely non-covalent interactions between complex and peptide

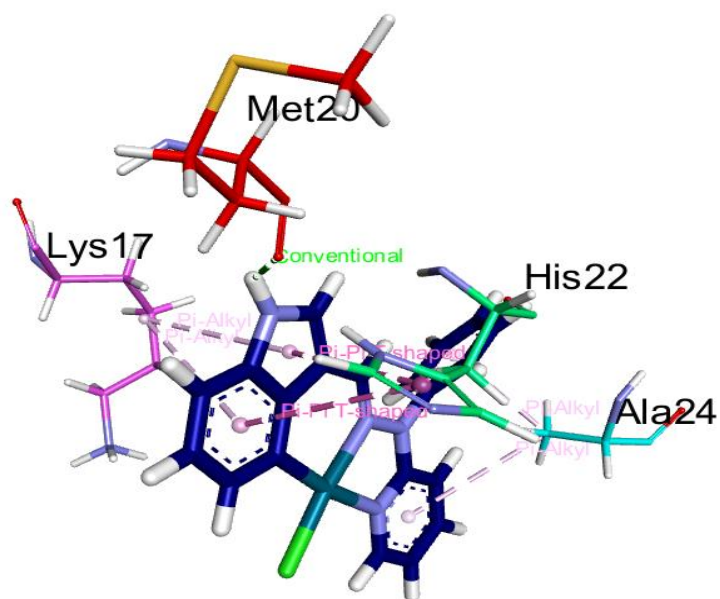

**Figure S21:** 3D Schematic representation displaying the type of non-covalent interaction between complex and peptide residues

| Name                     | Visible                                 | Color                                  | Parent         | Distance | Category      | Types                      | From       | From Chemistry | To        | To Chemistry |
|--------------------------|-----------------------------------------|----------------------------------------|----------------|----------|---------------|----------------------------|------------|----------------|-----------|--------------|
| 1 d:RES1:H41 - A:MET20:O | <input checked="" type="checkbox"/> Yes | <span style="color: green;">■</span>   | Ligand Non-... | 2.0423   | Hydrogen Bond | Conventional Hydrogen Bond | d:RES1:H41 | H-Donor        | A:MET20:O | H-Acceptor   |
| 2 A:HIS22 - d:RES1       | <input checked="" type="checkbox"/> Yes | <span style="color: magenta;">■</span> | Ligand Non-... | 4.81596  | Hydrophobic   | Pi-Pi T-shaped             | A:HIS22    | Pi-Orbitals    | d:RES1    | Pi-Orbitals  |
| 3 A:HIS22 - d:RES1       | <input checked="" type="checkbox"/> Yes | <span style="color: magenta;">■</span> | Ligand Non-... | 4.71561  | Hydrophobic   | Pi-Pi T-shaped             | A:HIS22    | Pi-Orbitals    | d:RES1    | Pi-Orbitals  |
| 4 d:RES1 - A:LYS17       | <input checked="" type="checkbox"/> Yes | <span style="color: magenta;">■</span> | Ligand Non-... | 5.13848  | Hydrophobic   | Pi-Alkyl                   | d:RES1     | Pi-Orbitals    | A:LYS17   | Alkyl        |
| 5 d:RES1 - A:LYS17       | <input checked="" type="checkbox"/> Yes | <span style="color: magenta;">■</span> | Ligand Non-... | 4.60945  | Hydrophobic   | Pi-Alkyl                   | d:RES1     | Pi-Orbitals    | A:LYS17   | Alkyl        |
| 6 d:RES1 - A:ALA24       | <input checked="" type="checkbox"/> Yes | <span style="color: magenta;">■</span> | Ligand Non-... | 4.2816   | Hydrophobic   | Pi-Alkyl                   | d:RES1     | Pi-Orbitals    | A:ALA24   | Alkyl        |
| 7 d:RES1 - A:ALA24       | <input checked="" type="checkbox"/> Yes | <span style="color: magenta;">■</span> | Ligand Non-... | 3.27704  | Hydrophobic   | Pi-Alkyl                   | d:RES1     | Pi-Orbitals    | A:ALA24   | Alkyl        |

**Figure S22:** Interaction parameters between complex and peptide

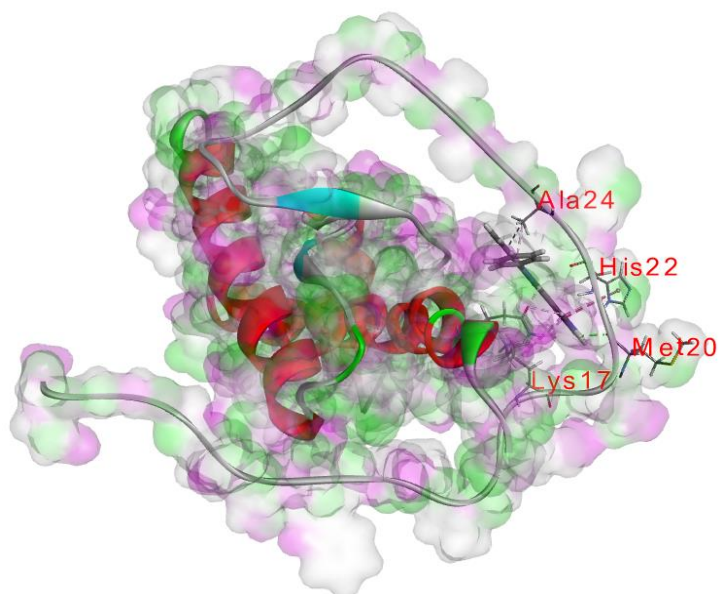

**Figure S23:** Hydrogen bond Donor/acceptor surface plot of peptide and complex

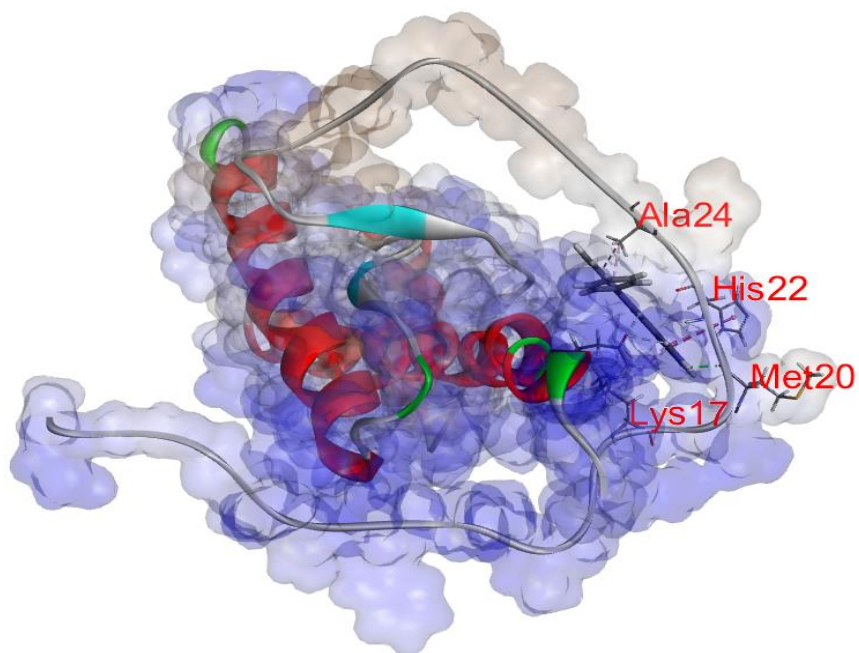

**Figure S24:** Hydrophobic surface plot of peptide and complex.

D:\Data\KG\020524\Peptide\0\_N1\1\1Ref

Comment 1

Comment 2

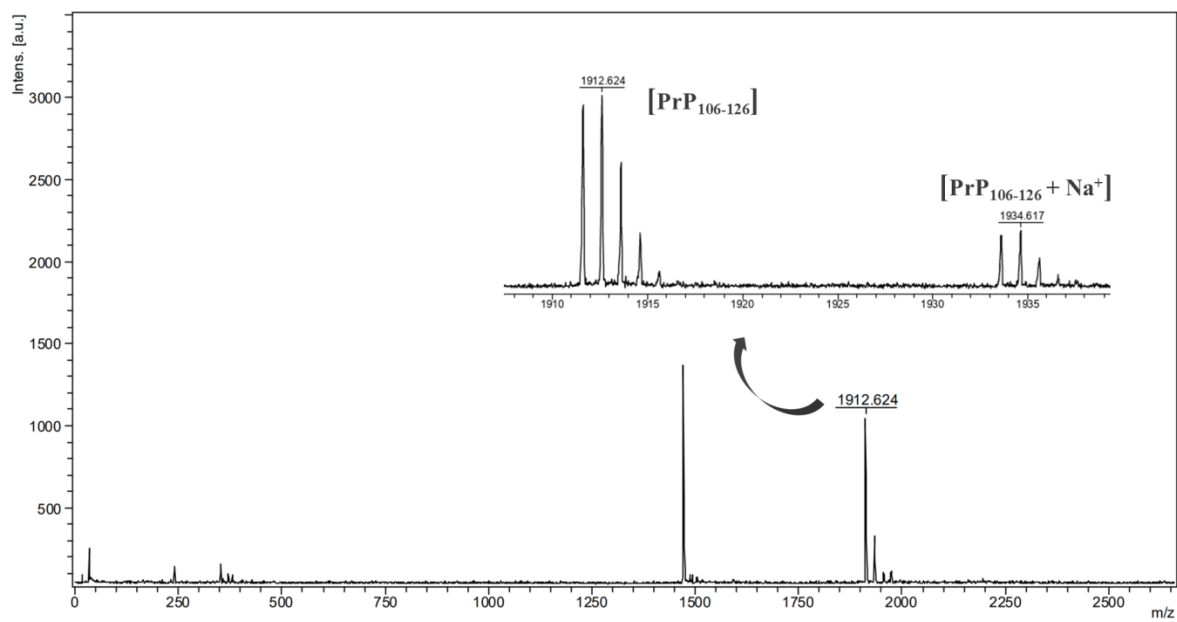

**Figure S25:** MALDI-TOF MS spectra of PrP<sub>106-126</sub>



Comment 1  
Comment 2

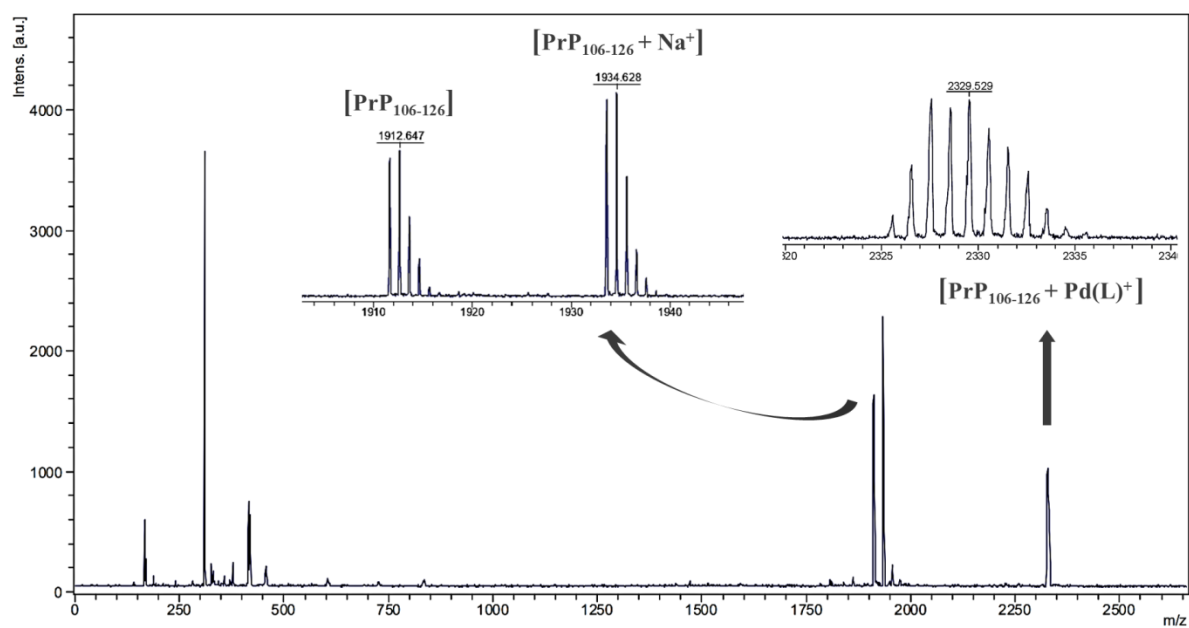

**Figure S26:** MALDI-TOF MS spectra of PrP<sub>106-126</sub> incubated with complex

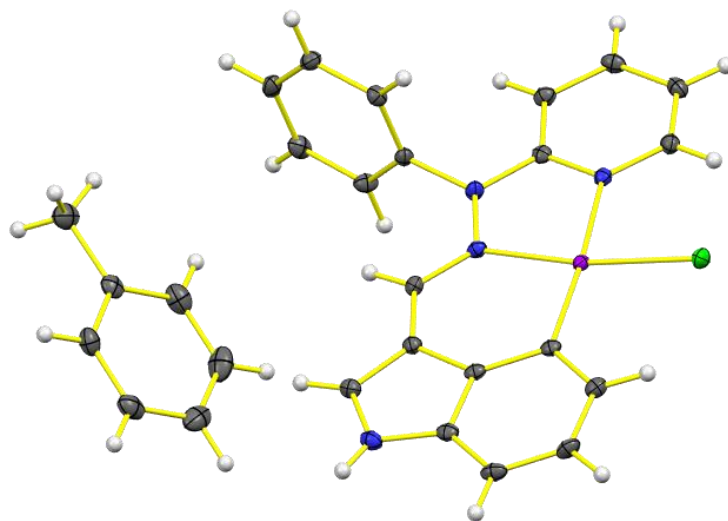

**Figure S27:** ORTEP plot of complex with hydrogen atoms and solvent molecule with 50% probability level.

**Table S1 Crystal data and structure refinement for complex**

|                                             |                                                               |
|---------------------------------------------|---------------------------------------------------------------|
| Empirical formula                           | C <sub>27</sub> H <sub>23</sub> ClN <sub>4</sub> Pd           |
| Formula weight                              | 545.34                                                        |
| Temperature/K                               | 80.0                                                          |
| Crystal system                              | monoclinic                                                    |
| Space group                                 | P2 <sub>1</sub> /n                                            |
| a/Å                                         | 15.4895(3)                                                    |
| b/Å                                         | 9.3366(2)                                                     |
| c/Å                                         | 16.3909(3)                                                    |
| α/°                                         | 90                                                            |
| β/°                                         | 106.1750(10)                                                  |
| γ/°                                         | 90                                                            |
| Volume/Å <sup>3</sup>                       | 2276.61(8)                                                    |
| Z                                           | 4                                                             |
| ρ <sub>calc</sub> /g/cm <sup>3</sup>        | 1.591                                                         |
| μ/mm <sup>-1</sup>                          | 0.956                                                         |
| F(000)                                      | 1104.0                                                        |
| Crystal size/mm <sup>3</sup>                | 0.111 × 0.068 × 0.04                                          |
| Radiation                                   | MoKα (λ = 0.71073)                                            |
| 2θ range for data collection/°              | 4.258 to 56.596                                               |
| Index ranges                                | -20 ≤ h ≤ 20, -12 ≤ k ≤ 12, -21 ≤ l ≤ 21                      |
| Reflections collected                       | 81204                                                         |
| Independent reflections                     | 5661 [R <sub>int</sub> = 0.0593, R <sub>sigma</sub> = 0.0245] |
| Data/restraints/parameters                  | 5661/0/302                                                    |
| Goodness-of-fit on F <sup>2</sup>           | 1.069                                                         |
| Final R indexes [I ≥ 2σ (I)]                | R <sub>1</sub> = 0.0232, wR <sub>2</sub> = 0.0544             |
| Final R indexes [all data]                  | R <sub>1</sub> = 0.0268, wR <sub>2</sub> = 0.0564             |
| Largest diff. peak/hole / e Å <sup>-3</sup> | 0.56/-0.40                                                    |

**Table S2 Bond Lengths for complex.**

| Atom | Atom | Length/Å    | Atom | Atom | Length/Å  |
|------|------|-------------|------|------|-----------|
| Pd1  | C11  | 2.3049 (4)  | C7   | C8   | 1.382 (2) |
| Pd1  | N2   | 2.0390 (14) | C7   | C14  | 1.422 (2) |
| Pd1  | N4   | 2.0906 (14) | C9   | C13  | 1.405 (2) |
| Pd1  | C1   | 2.0023 (16) | C10  | C11  | 1.370 (2) |
| N1   | C3   | 1.385 (2)   | C11  | C12  | 1.394 (2) |
| N1   | C8   | 1.356 (2)   | C12  | C13  | 1.375 (2) |
| N2   | N3   | 1.4090 (18) | C15  | C16  | 1.389 (2) |
| N2   | C14  | 1.301 (2)   | C15  | C20  | 1.389 (2) |
| N3   | C9   | 1.381 (2)   | C16  | C17  | 1.388 (2) |
| N3   | C15  | 1.437 (2)   | C17  | C18  | 1.386 (2) |
| N4   | C9   | 1.339 (2)   | C18  | C19  | 1.383 (3) |
| N4   | C10  | 1.354 (2)   | C19  | C20  | 1.385 (2) |
| C1   | C2   | 1.405 (2)   | C21  | C22  | 1.390 (3) |
| C1   | C6   | 1.397 (2)   | C21  | C26  | 1.384 (3) |
| C2   | C3   | 1.411 (2)   | C21  | C27  | 1.504 (3) |
| C2   | C7   | 1.436 (2)   | C22  | C23  | 1.381 (3) |
| C3   | C4   | 1.392 (2)   | C23  | C24  | 1.379 (3) |
| C4   | C5   | 1.381 (3)   | C24  | C25  | 1.379 (3) |
| C5   | C6   | 1.407 (2)   | C25  | C26  | 1.388 (3) |

**Table S3 Bond Angles for complex**

| Atom | Atom | Atom | Angle/°     | Atom | Atom | Atom | Angle/°     |
|------|------|------|-------------|------|------|------|-------------|
| N2   | Pd1  | C11  | 171.27 (4)  | C8   | C7   | C2   | 107.20 (14) |
| N2   | Pd1  | N4   | 79.22 (5)   | C8   | C7   | C14  | 126.93 (15) |
| N4   | Pd1  | C11  | 93.47 (4)   | C14  | C7   | C2   | 125.86 (15) |
| C1   | Pd1  | C11  | 92.32 (5)   | N1   | C8   | C7   | 109.31 (15) |
| C1   | Pd1  | N2   | 95.15 (6)   | N3   | C9   | C13  | 120.65 (15) |
| C1   | Pd1  | N4   | 173.93 (6)  | N4   | C9   | N3   | 117.00 (14) |
| C8   | N1   | C3   | 109.60 (14) | N4   | C9   | C13  | 122.34 (15) |
| N3   | N2   | Pd1  | 112.71 (10) | N4   | C10  | C11  | 122.53 (16) |
| C14  | N2   | Pd1  | 129.61 (11) | C10  | C11  | C12  | 118.68 (16) |
| C14  | N2   | N3   | 117.68 (13) | C13  | C12  | C11  | 119.88 (16) |
| N2   | N3   | C15  | 120.74 (13) | C12  | C13  | C9   | 118.04 (16) |
| C9   | N3   | N2   | 117.16 (13) | N2   | C14  | C7   | 120.71 (15) |
| C9   | N3   | C15  | 119.97 (13) | C16  | C15  | N3   | 119.03 (15) |
| C9   | N4   | Pd1  | 113.80 (11) | C20  | C15  | N3   | 119.85 (15) |

|     |    |     |             |     |     |     |             |
|-----|----|-----|-------------|-----|-----|-----|-------------|
| C9  | N4 | C10 | 118.51 (14) | C20 | C15 | C16 | 121.07 (15) |
| C10 | N4 | Pd1 | 127.68 (11) | C17 | C16 | C15 | 119.21 (15) |
| C2  | C1 | Pd1 | 116.98 (12) | C18 | C17 | C16 | 120.22 (16) |
| C6  | C1 | Pd1 | 127.83 (13) | C19 | C18 | C17 | 119.88 (16) |
| C6  | C1 | C2  | 115.19 (15) | C18 | C19 | C20 | 120.80 (16) |
| C1  | C2 | C3  | 122.09 (15) | C19 | C20 | C15 | 118.82 (16) |
| C1  | C2 | C7  | 131.66 (15) | C22 | C21 | C27 | 120.59 (17) |
| C3  | C2 | C7  | 106.25 (14) | C26 | C21 | C22 | 117.52 (18) |
| N1  | C3 | C2  | 107.63 (15) | C26 | C21 | C27 | 121.89 (18) |
| N1  | C3 | C4  | 130.50 (16) | C23 | C22 | C21 | 121.64 (18) |
| C4  | C3 | C2  | 121.87 (16) | C24 | C23 | C22 | 119.93 (19) |
| C5  | C4 | C3  | 116.18 (16) | C25 | C24 | C23 | 119.51 (19) |
| C4  | C5 | C6  | 122.40 (16) | C24 | C25 | C26 | 120.10 (19) |
| C1  | C6 | C5  | 122.25 (16) | C21 | C26 | C25 | 121.29 (19) |
